# Supplementary material for: Integrative Taxonomy of Southeast Asian Snail-Eating Turtles (Geoemydidae: Malayemys) Reveals a New Species and Mitochondrial Introgression
Source: PubMed Central journal article supplement (PMC4822821; doi:10.1371/journal.pone.0153108), 2016-04-06

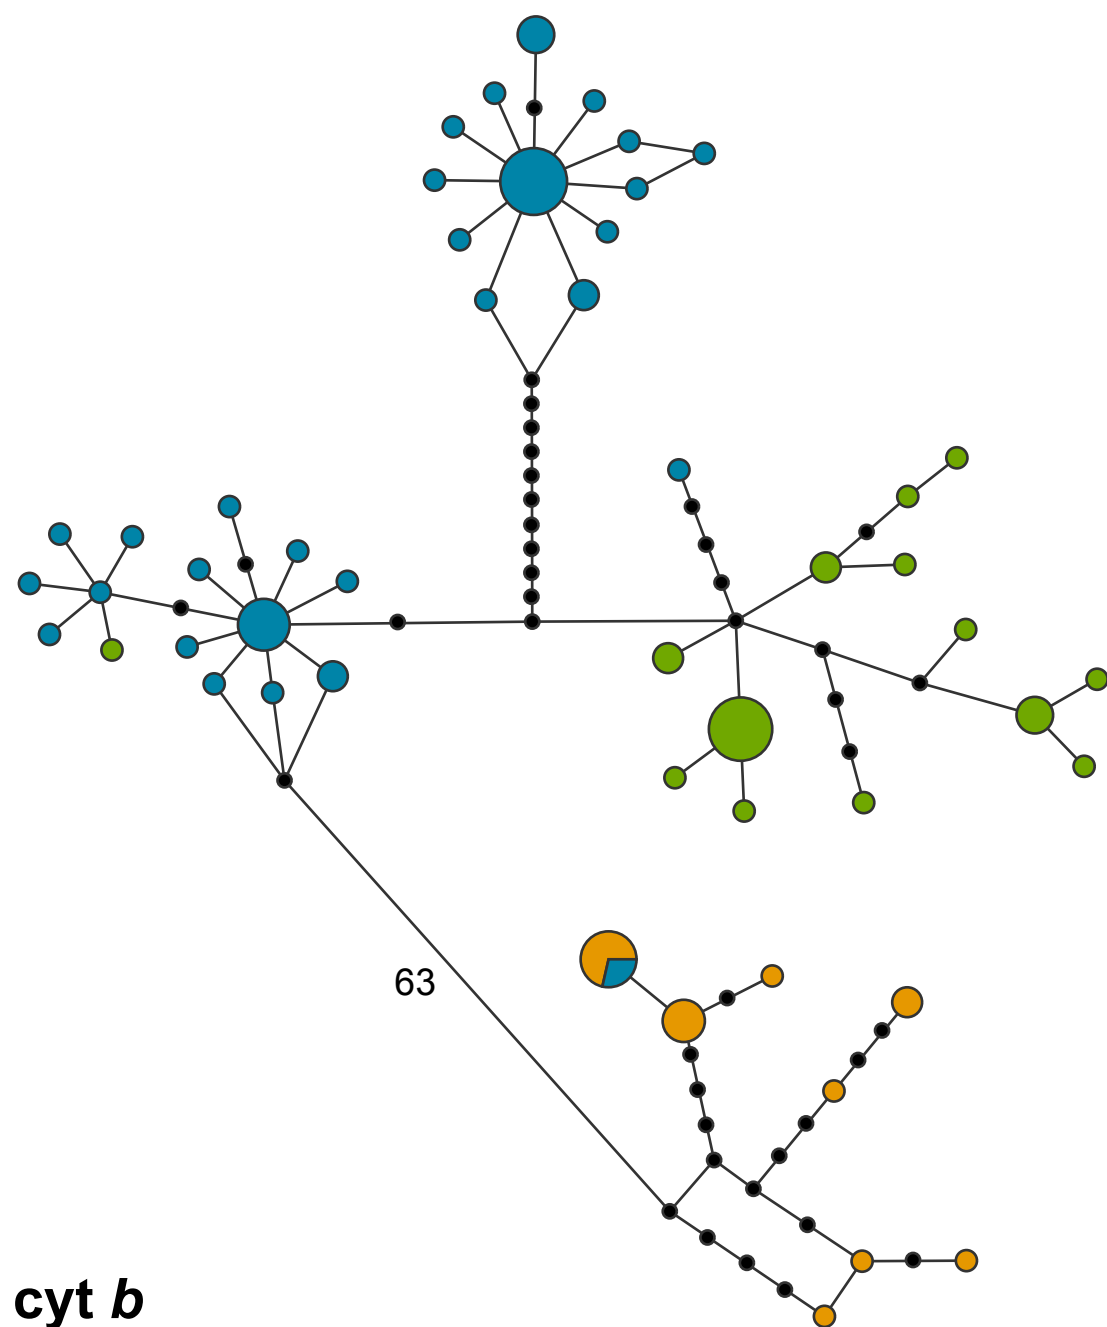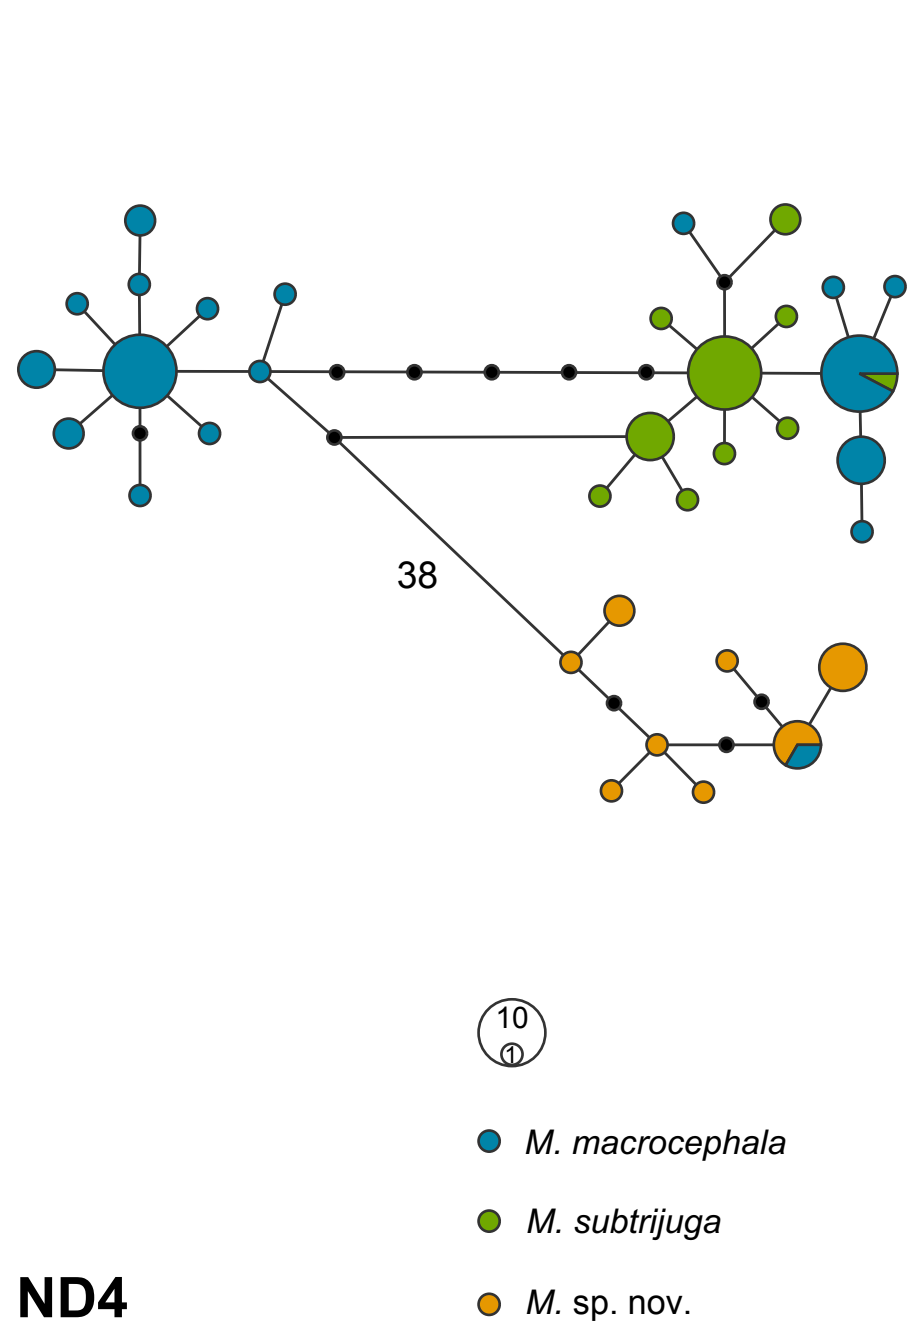

Supplement: pone.0153108.s002.pdf [file pone.0153108.s002.pdf]
